# Supplementary material for: Twin study shows association between monocyte chemoattractant protein-1 and kynurenic acid in cerebrospinal fluid
Source: Springer Nature journal article supplement (doi:10.1007/s00406-019-01042-9), 2019-07-13

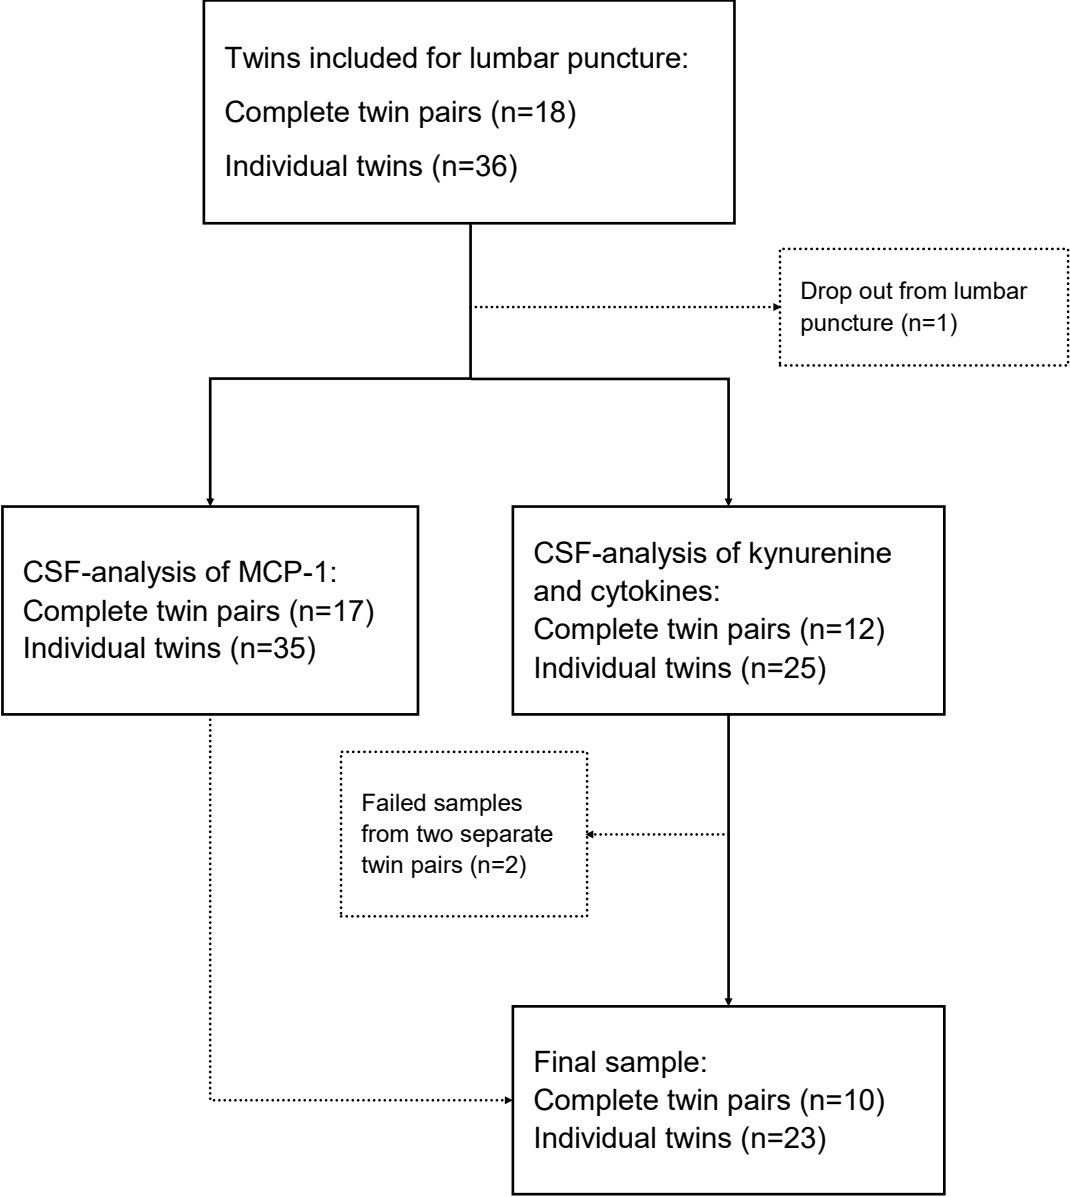

Supplement: MOESM2 [file 16926832]
