# Supplementary material for: Twin study shows association between monocyte chemoattractant protein-1 and kynurenic acid in cerebrospinal fluid
Source: Springer Nature journal article supplement (doi:10.1007/s00406-019-01042-9), 2019-07-13
Supplement: MOESM3 [file 16926832]

**Supplementary table 1.** Associations between all cerebrospinal fluid (CSF) markers included in this report in all twins (n=23). Results from the linear regression analysis of the mean values in all twins.

|               | KYNA                                | QUIN                        | TRP                                 | IL-6                                 | IL-8                                 | TNF- $\alpha$                        |
|---------------|-------------------------------------|-----------------------------|-------------------------------------|--------------------------------------|--------------------------------------|--------------------------------------|
| MCP-1         | <b>Reg. coef. 0.48,<br/>p=0.001</b> | Reg. coef. 0.16,<br>p=0.283 | <b>Reg. coef. 0.40,<br/>p=0.006</b> | <b>Reg. coef. -0.22,<br/>p=0.036</b> | Reg. coef. 0.022,<br>p=0.888         | Reg. coef. -0.12,<br>p=0.575         |
| KYNA          | ***                                 | Reg. coef. 0.15,<br>p=0.496 | <b>Reg. coef. 0.79,<br/>p=0.001</b> | Reg. coef. -0.097,<br>p=0.369        | Reg. coef. -0.21,<br>p=0.355         | Reg. coef. 0.21,<br>p=0.304          |
| QUIN          |                                     | ***                         | Reg. coef. -0.16,<br>p=0.417        | Reg. coef. -0.0011,<br>p=0.992       | <b>Reg. coef. 0.86,<br/>p=0.0001</b> | <b>Reg. coef. 0.81,<br/>p=0.0001</b> |
| TRP           |                                     |                             | ***                                 | Reg. coef. -0.14,<br>p=0.118         | Reg. coef. -0.32,<br>p=0.182         | Reg. coef. -0.31,<br>p=0.147         |
| IL-6          |                                     |                             |                                     | ***                                  | Reg. coef. 0.19,<br>p=0.241          | Reg. coef. 0.25,,<br>p=0.268         |
| IL-8          |                                     |                             |                                     |                                      | ***                                  | <b>Reg. coef. 0.97<br/>p=0.0001</b>  |
| TNF- $\alpha$ |                                     |                             |                                     |                                      |                                      | ***                                  |

Note: MCP-1 = Monocyte chemoattractant protein 1, KYNA = Kynurenic acid, QUIN = Quinolinic acid, TRP = Tryptophan, IL-6 = Interleukin 6, IL-8 = Interleukin 8, and TNF- $\alpha$  = Tumor necrosis factor-alpha.

Linear regression with a cluster-robust sandwich estimator for the standard errors to account for the twin pair relationships. Results presented as the regression coefficient (Reg. coef.) and p-values. Adjusted for age and sex.

Parts of the results were published elsewhere (Kegel, M.E., et al., Kynurenic acid and psychotic symptoms and personality traits in twins with psychiatric morbidity. *Psychiatry Res*, 2017. **247**: p. 105-112).
